# Supplementary material for: Comparison of Hormone-Sensitive Oligorecurrent Prostate Cancer Patients Based on Routine Use of Choline and/or PSMA PET/CT to Guide Metastasis-Directed Therapy
Source: MDPI journal article supplement (doi:10.3390/cancers15061898), 2023-03-22
Supplement: s1 [file s1]

**Table S1.** Review of the study literature evaluating the clinical impact of PSMA or FCH PET/CT-directed radiotherapy.

| Authors<br>(Only Retro-<br>spective study)  | Patients<br>number<br>(lesions) | Disease Sta-<br>tus                                                          | Median<br>PSA be-<br>fore<br>PET/CT<br>(ng/mL) | Treatment received                                                                                                                               | Median fol-<br>low up | Results                                                                                                                                                                                                                                                                                                                                                                                    |
|---------------------------------------------|---------------------------------|------------------------------------------------------------------------------|------------------------------------------------|--------------------------------------------------------------------------------------------------------------------------------------------------|-----------------------|--------------------------------------------------------------------------------------------------------------------------------------------------------------------------------------------------------------------------------------------------------------------------------------------------------------------------------------------------------------------------------------------|
| Mazzola et al.<br>[31]<br>2021              | 88<br>(118)                     | Oligo-meta-<br>static recur-<br>rence ( $\leq 3$ le-<br>sions)               | PSMA =<br>0.58<br>FCH = 2.04                   | Only SBRT without ADT                                                                                                                            | 25 months             | Longer ADT-FS in patients treated with SBRT guided by PSMA vs FCH<br>→ ADT-FS at 1 and 2 years: PSMA = 87.8% and 82.3% vs FCH = 73.2%<br>and 63.8% (p=0.010).                                                                                                                                                                                                                              |
| Schmidt-<br>Hegemann et<br>Al. [33]<br>2020 | 272<br>(NA)                     | Persistent<br>PSA after RP<br>or 1 <sup>st</sup> BR                          | PSMA =<br>0.58<br>FCH = 0.6                    | Prostate bed RT ; Elective<br>pelvic nodes RT $\pm$ boost ;<br>Metastatic RT ; $\pm$ ADT as-<br>sociated<br>(combination of several RT<br>types) | 30 months             | No difference on BR-FS between PSMA or FCH RT guided → BR-FS at<br>1 and 2 years : PSMA = 63% and 55% vs FCH=73% and 63% (p=0.197).<br>In multivariate analysis, V radiopharmaceutical used → High PSA level<br>before PET/CT was a pejorative factor for BR-FS (p=0.024).                                                                                                                 |
| Deijen et Al.<br>[32]<br>2021               | 50<br>(72)                      | Oligo-meta-<br>static only<br>( $\leq 4$ lesions)                            | PSMA =<br>1.8<br>FCH = 4.2                     | SBRT $\pm$ ADT associated                                                                                                                        | 24.3 months           | Longer ADT-FS if SBRT guided by PSMA vs FCH → Median ADT-FS<br>PSMA = 32.7 months vs FCH = 14.9 months (p=0.010).<br>In multivariate analysis, V radiopharmaceutical used → High PSA level<br>before PET/CT was a pejorative factor for ADT-FS (p=0.025).                                                                                                                                  |
| Our Study<br>2022                           | 123<br>(204)                    | Bed prostate<br>or oligo-<br>metastatic<br>recurrence<br>( $\leq 5$ lesions) | PSMA =<br>0.48<br>FCH = 1.27                   | Prostate bed RT $\pm$ boost ;<br>Elective node RT $\pm$ boost ;<br>SBRT ; $\pm$ ADT associated<br>(combination of several RT<br>types)           | 42.2 months           | Longer BR-FS if RT guided by PSMA vs FCH → median BR-FS PSMA =<br>24.7 months vs FCH = 13.0 months (p=0.008).<br>Longer ADT-FS if RT guided by PSMA vs FCH → ADT-FS at 2 and 3<br>years PSMA = 75.9% et 65.5% vs FCH = 49.8% et 24.7% (p=0.001).<br>In multivariate analysis, V radiopharmaceutical used → short PSA TD<br>(p=0.005) and SBRT (p=0.001) were pejorative factors for BR-FS. |
